# Title:

## Assortment of flowering time and immunity alleles in natural *Arabidopsis thaliana* populations suggests immunity and vegetative lifespan strategies coevolve

Authors: Shirin Glander<sup>1</sup>, Fei He<sup>2</sup>, Gregor Schmitz<sup>2</sup>, Anika Witten<sup>1</sup>, Arndt Telschow<sup>3</sup>, J. de Meaux<sup>2</sup>

Address:

(1) Department of Genetic Epidemiology, Institute of Human Genetics, University of Münster, Albert-Schweitzer-Campus 1, D3, Domagkstraße 3, Münster, Germany

(2) Institute of Botany, University of Cologne, Zùlpicherstr. 47b, Cologne Germany

(3) Institute for Evolution and Biodiversity, University of Münster, Hüfferstraße 1, Münster, Germany

Corresponding author: [jdemeaux@uni-koeln.de](mailto:jdemeaux@uni-koeln.de)

Running title: Assortment of immunity and flowering time alleles

### ABSTRACT:

The selective impact of pathogen epidemics on host defenses can be strong but remains transient. By contrast, life-history shifts can durably and continuously modify the balance between costs and benefits of immunity, which arbitrates the evolution of host defenses. Their impact on the evolutionary dynamics of host immunity, however, has seldom been documented. Optimal investment into immunity is expected to decrease with shortening lifespan, because a shorter life decreases the probability to encounter pathogens or enemies. Here, we document that in natural populations of *Arabidopsis thaliana*, the expression levels of immunity genes correlate positively with flowering time, which in annual species is a proxy for lifespan. Using a novel genetic strategy based on bulk-segregants, we partitioned flowering time-dependent from – independent immunity genes and could demonstrate that this positive co-variation can be genetically separated. It is therefore not explained by the pleiotropic action of some major regulatory genes controlling both immunity and lifespan. Moreover, we find that immunity genes containing variants reported to impact fitness in natural field conditions are among the genes whose expression co-varies most strongly with flowering time. Taken together, these analyses reveal that natural selection has likely assorted alleles promoting lower expression of immunity genes with alleles that decrease the duration of vegetative lifespan in *A. thaliana* and *vice versa*. This is the first study documenting a pattern of variation consistent with the impact that selection on flowering time is predicted to have on diversity in host immunity.

Keywords: Immunity, Flowering time, Lifespan, *Arabidopsis thaliana*, Transcriptomics, Trade-off, Pleiotropy, bulk-segregant sequencing

### INTRODUCTION

The ability of organisms to defend against pathogens is a major determinant of survival in natural populations (Parker & Gilbert, 2004; Chisholm *et al.*, 2006; Lee & Mazmanian, 2010). Pathogens have long been suspected to impose a fast evolution of the host immune system and the “Red Queen” Hypothesis is nowadays a keystone of evolutionary biology (Van Valen, 1973; Liow *et al.*, 2011). Evidence that pathogens drive the molecular evolution of host defense systems has been accumulating in an array of plant and animal systems (Bergelson *et al.*, 2001; de Meaux &

Mitchell-Olds, 2003; Moeller & Tiffin, 2005; Ravensdale *et al.*, 2010; Laine *et al.*, 2010; Maekawa *et al.*, 2011; Dybdahl *et al.*, 2014; Karasov *et al.*, 2014; Siddle & Quintana-Murci, 2014; Parker *et al.*, 2015; Metzger *et al.*, 2016).

Yet, the possible impact of changes in ecology on the evolution of defense systems should also be considered as they may durably change the exposure of hosts to pathogens. Invasive species, for example, owe much of their success to the release from pathogen and pest pressures (Mitchell & Power, 2003; Mitchell *et al.*, 2010). Similarly, shifts in life history can alter the balance between costs and benefits of host defense systems (Herms & Mattson, 1992). Shifting from perennial to annual life cycles, or evolving from a winter-annual to summer-annual cycling occurs frequently across plant phylogenies (Garnier, 1992; Michaels *et al.*, 2003; Franks *et al.*, 2007; Tank & Olmstead, 2008; Matthew Ogburn & Edwards, 2015; Kiefer *et al.*, 2017). The reduction in lifespan that follows such life history changes concomitantly reduces the probability to encounter enemies (Jokela *et al.*, 2000). As a matter of fact, woody plant species with longer lifespan often display stronger herbivore defenses (Endara & Coley, 2010). As a consequence, immunity and lifespan are expected to coevolve.

*Arabidopsis thaliana* populations offer an optimal model for catching the co-evolution of life history and immunity in the act. *A. thaliana* has become over the last decade a powerful model system to address ecological questions at the genetic level (Mitchell-Olds & Schmitt, 2006; Bergelson & Roux, 2010; Roux & Bergelson, 2016). Experiments in common gardens have been performed to describe the architecture of natural variation in fitness and to infer geographic distributions of locally adaptive mutations (Fournier-Level *et al.*, 2011; Hancock *et al.*, 2011; Fournier-Level *et al.*, 2016). Analyses of mutants and recombinant inbred lines (RIL) have allowed reconstructing the contribution of phenotypes to fitness (Wilczek *et al.*, 2009; Chiang *et al.*, 2013; Fournier-Level *et al.*, 2013). Secondary chemical compounds were shown to have evolved to deter predominant herbivores in natural populations (Brachi *et al.*, 2013; Kerwin *et al.*, 2015). Clinal variation along the latitudinal range of the species reveals how phenotypes expressed along the life cycle are jointly shaped by natural selection (Lasky, 2012; Debieu *et al.*, 2013; Vidigal *et al.*, 2016).

*A. thaliana* is arguably one of the species for which we have the largest amount of genetic and phenotypic information on both immune reactions against pathogens and variation in the duration of the vegetative lifespan. As such, it is an optimal model system for assessing the impact of life history changes, which modify plant vegetative lifespan, on the evolution of the immunity system. Indeed, in annual (monocarpic) species, which grow and reproduce only once, flowering time marks the end of the vegetative growth phase. Seed production in monocarpic species is terminated by senescence and death, so that flowering time provides a good proxy for lifespan. In *A. thaliana*, it has been scored in a number of conditions (Brachi *et al.*, 2010; Sasaki *et al.*, 2015; Roux & Bergelson, 2016) and flowering time changes are often locally adaptive (Le Corre, 2005; Toomajian *et al.*, 2006; Montesinos-Navarro *et al.*, 2011; Debieu *et al.*, 2013; Li *et al.*, 2014; Hu *et al.*, 2017). Natural variation in flowering time can thus be used to investigate the impact of lifespan changes on host defenses.

The immune system has also been intensively studied in this species, revealing multiple layers of defenses, ranging from basal immunity, which is sufficient to control most microbes, to severe reactions that actively defeat virulent pathogens (Jones & Dangl, 2006). Strain-specific immunity components are likely to be linked in their evolution to the virulence specificity of co-occurring pathogens (de Meaux & Mitchell-Olds, 2003; Moeller & Tiffin, 2005; Roux & Bergelson, 2016). Recent fluctuations in the composition of the pathogen population may therefore affect the

specific components of immunity targeted by these epidemics and thereby mask or blur the long-term impact of lifespan modifications. To minimize this effect and to highlight the impact of lifespan variation, we took a genomics approach and examined how flowering time co-varies with expression levels of genes with an experimentally-supported function in immunity. These approximately 700 genes jointly reflect a broad spectrum of traits, which, when their expression increases have a positive effect on immunity (Eulgem, 2005; Vetter *et al.*, 2012; Boccara *et al.*, 2014). We test below whether their expression level, a proxy for their effectiveness, co-varies with flowering time, a proxy for lifespan in the field and further examine the roles played by demographic history and pleiotropy in shaping patterns of co-variation.

## RESULTS

### Positive co-variation between expression levels of immunity genes and the timing of flowering in Swedish *A. thaliana* populations

We first focused on a set of 138 genotypes originating from Sweden because high quality data were available for both genome-wide expression profiles and flowering time estimates (Dubin *et al.*, 2015; Sasaki *et al.*, 2015). These two studies were part of a single experiment in which flowering time and gene expression were characterized at both 16°C and 10°C under long day conditions in growth chambers. We focused on the data collected at 16°C and computed Spearman correlation coefficients between the expression level of each gene and flowering time. Of 22,686 genes, for which expression levels could be quantified, 1,374 (6%) were significantly correlated with flowering time under a 5% false discovery rate (FDR). We first verified that genes annotated for their function in flowering time were among the genes whose expression correlates with the phenotype. Overall, genes with an experimentally validated function in flowering time in the genome were not enriched among those genes (6.9% of 630 genes at FDR 0.05, Hypergeometric test,  $p = 0.19$ ), yet the two well-known regulators of flowering time, FLOWERING LOCUS C and SUPPRESSOR OF OVEREXPRESSION OF CONSTANS-1 (FLC and SOC1, Spearman correlation  $\rho = 0.50$  and  $-0.62$ , FDR-corrected  $p = 2.87 \times 10^{-6}$  and  $p = 7 \times 10^{-12}$ , respectively) were the two most strongly correlated genes. In addition, using the R-package TopGO, we examined patterns of functional enrichment among genes that tended to be more expressed in early flowering genotypes. Many functional gene ontology (GO) categories related to cell differentiation and growth were enriched (Suppl. Table S1) and the GO category “regulation of flower development” was among the most over-represented ( $p = 8.00 \times 10^{-14}$ , Suppl. Table 1). This observation confirmed the biological relevance of the data set examined.

Next, we tested whether immunity genes were enriched among genes whose expression correlated with the timing of flowering. Among genes with significant correlation with the phenotype, we observed a significant excess of immunity genes (8.6% of 691 genes at 5% FDR, hypergeometric test,  $p = 0.002$ ). The distribution of correlation coefficients was also significantly skewed towards higher correlation coefficients for immunity genes (Fig. 2A, Kolmogorov-Smirnov test,  $p < 2.2 \times 10^{-16}$ ). GO enrichment analysis showed that genes involved in GO “oxidation-reduction process” and “response to wounding” were among the most strongly enriched ( $p < 1 \times 10^{-30}$ ,  $p = 1.1 \times 10^{-19}$ , respectively, Suppl. Table 1). This first analysis revealed a pronounced pattern of positive co-variation between flowering time and the expression of immunity genes.

In laboratory conditions, genotypes with a strong requirement for vernalization tend to show a strong delay in flowering that often does not translate into late flowering in the field (Brachi *et al.*,

2010; Li *et al.*, 2014). Indeed, in the field plants often experience sufficient levels of cold to fulfill their vernalization requirement. In fact, only the 51 genotypes that advanced their flowering time at 16°C compared to 10°C (e.g. those that did not need low temperatures to induce flowering), showed a correlation in their flowering across temperatures (Sasaki *et al.*, 2015). Flowering time variation across the latter sub-sample of genotypes may therefore allow a more accurate classification of genotypes with increasing vegetative lifespan. Among the 507 out of 22,686 (2.2%) genes that displayed a significant positive correlation with flowering time at 10% FDR across this restricted sample of genotypes, 16/630 genes were annotated for their function in flowering. As in the above, several known flowering time regulators were among the genes associated with flowering time, such as FLOWERING LOCUS C (FLC), GIGANTEA, FLOWERING PROMOTING FACTOR 1-LIKE PROTEIN 2 (FLP2) or even the genes PHYTOCHROME INTERACTING FACTOR 4 (PIF4) and PHYTOCHROME INTERACTING FACTOR 5 (PIF5), which had been associated with accelerated flowering (Andrés & Coupland, 2012; Thines *et al.*, 2014). Although the whole set of flowering time genes was not significantly enriched among genes correlating positively with the timing of flowering (2.5%, hypergeometric test,  $p=0.24$ ), they tended to be more highly expressed in early flowering genotypes (excess of negative correlations, Kolmogorov-Smirnov test,  $p=1.16e-13$ , Fig. 2B). The GO category “regulation of flower development” was even more over-represented in this dataset ( $p<1e-30$ , Suppl. Table 1). Higher expression of genes associated with the positive regulation of flowering was observed among early-flowering genotypes. This further confirms that expression variation was correctly quantified.

We also observed that variation in immunity gene expression tended to correlate positively with variation in flowering time, after excluding vernalization-sensitive genotypes. In total expression of 28 of the 691 genes belonging to the immunity gene category correlated significantly with flowering at 10% FDR. They were significantly enriched (4%, 1.8-fold enrichment, hypergeometric test,  $p=0.0009$ ). Compared to the ensemble of expressed genes in the genome, they generally tended to be more highly expressed in late flowering genotypes (marked excess of positive correlations, Kolmogorov-Smirnov test,  $p<2.2e-16$ , Fig. 2B). GO enrichment analysis showed that genes involved in the GO categories “response to chitin” and “regulation of plant-type hypersensitive response” were the two most strongly enriched (both  $p<1e-30$ , Suppl. Table 1). We thus conclude that the correlation between expression of immunity genes and the timing of flowering is independent of allelic variation in vernalization requirements.

### **Positive co-variation of immunity gene expression with flowering time is independent of population structure and is also detected in a second sample of broader geographic origin**

Relatedness among individuals in the sample may drive the correlation between expression of immunity genes and the timing of flowering. In fact, flowering time in the Swedish lines is strongly associated with the demographic history of these populations and thus with their population structure (Dubin *et al.*, 2015; Sasaki *et al.*, 2015). We therefore also computed for each gene, the correlation between gene expression and flowering time with a mixed-model that included a kinship matrix for the 51 genotypes that lacked vernalization requirement (see methods; Yu *et al.*, 2006; Stich *et al.*, 2008). This analysis revealed that, for immunity genes, the distribution of correlation coefficient estimates remained strongly skewed towards positive values, after population structure was accounted for (Kolmogorov-Smirnov test,  $p=2.2e-16$ ,



Suppl. Fig. 1). However, the whole set of immunity genes was no longer enriched among genes with a significant co-variation with flowering time (5.2% vs. 5%, hypergeometric test,  $p=0.6$ ). We note that accounting for population structure also did not change the pattern of co-variation between gene expression of flowering genes and timing of flowering itself. They showed a coefficient distribution that was strongly skewed towards negative values (Kolmogorov-Smirnov test,  $p=2.2e-16$ ) and were significantly over-represented among genes with expression significantly associated with flowering time (8% vs 5% at 5% FDR, hypergeometric test,  $p=0.0005$ ).

We further investigated whether the skew towards positive co-variation between immunity gene expression and flowering time is limited to the regional subset of genotypes growing in Sweden or whether it is a feature of diversity that segregates across the whole range of the species. For this, we turned to a species-wide dataset of gene expression variation collected in young seedlings (Schmitz *et al.*, 2013). For 52 of these genotypes, the duration of vegetative growth had been determined under natural conditions in the field (Brachi *et al.*, 2010). Although a skew towards negative correlation for flowering time genes was observed (Kolmogorov Smirnov test,  $p=5.3e-5$ , Fig. 2C), the seedling of these earlier flowering genotypes did not yet express genes important for the formation of flower (Suppl. Table 1).

Nevertheless, we again observed a strong skew towards positive correlation between immunity gene expression and flowering time, indicating that genotypes that will flower later expressed them at a higher level (Kolmogorov Smirnov test,  $p<2.2e-16$ , Fig. 2C). Immunity genes were not particularly enriched among genes with significantly correlated expression and flowering time at 5% FDR (5% for both, hypergeometric test,  $p=0.24$ ). Yet, GO categories such as “response to chitin”, “respiratory burst involved in immunity response”, “response to wounding” and immunity response to fungus” were the four most strongly enriched functions among genes with highest Spearman correlation coefficients (all  $p<1e-30$ , Suppl. Table 1).

Contrasting genotypes of diverse flowering time (e.g. lifespan) revealed that, in natural populations, immunity genes tend to co-vary positively with this trait. The latter two analyses showed that this effect remained when population structure was accounted for and was also detectable in another gene expression dataset and with a different set of genotypes.

## **A bulk-segregant analysis demonstrates that co-variation is not due to pleiotropic effect of flowering time control**

The tendency of immunity genes to show expression levels correlating positively with flowering may be due to the pleiotropic action of regulatory genes that co-regulate flowering time and immunity. In plants, the impact of development and growth regulators on defense systems is being increasingly recognized (Alcázar *et al.*, 2011). There is evidence that flowering time and defense control each other (Korves & Bergelson, 2003; Pagán *et al.*, 2008; Fan *et al.*, 2014; Lozano-Durán & Zipfel, 2015; Jiménez-Góngora *et al.*, 2015; Davila Olivas *et al.*, 2017; Develey-Riviere & Galiana, 2007; Pajerowska-Mukhtar *et al.*, 2009; Martinez *et al.*, 2004; Whalen, 2005; Kerwin *et al.*, 2015; Lyons *et al.* 2015). If so, the pattern we observed would not reflect the joint optimization of immunity and life history strategy but only the pleiotropic action of their regulators. We therefore asked to which extent flowering time and the expression of immune-related genes could be genetically separated and thus evolve independently.

We therefore designed an experiment to describe the level of pleiotropy of flowering time regulators on the expression of immunity genes. If such regulators control the pattern of

covariation reported in Fig. 2, it should not be possible to separate variation in immunity gene expression from variation in flowering time in a segregating recombinant inbred population. We used the two genotypes Col-0 and Bur-0, which differ in flowering time (Simon *et al.*, 2008) and were also reported to exhibit markedly distinct sensitivities to flagellin, with the later flowering genotype Bur-0 displaying stronger basal immunity (Vetter *et al.*, 2012). We analyzed the transcriptomes of these two lines at 14 and 28 days after germination (see methods) and found that the skews shown in Fig. 2 remain when the dataset was reduced to the genes that differed in expression between these two lines (Suppl. Fig. 2). This confirmed that these two genotypes could help identify immunity genes that share genetic regulators with flowering time.

We designed a cost-effective approach to identify the genes whose expression variation cannot be separated from flowering time. We used 244 recombinant inbred lines (RILs) derived from a cross between the parents Bur-0 and Col-0, followed by >8 generations of selfing (Simon *et al.*, 2008). We bulked RILs by their flowering time and characterized their transcriptomes at 14 and 28 days after germinations using RNA sequencing (see methods). In RILs, the genomes of the parental genotypes are randomly shuffled by recombination. Because of this genetic property, RILs are commonly used to identify Quantitative Trait Loci (QTL), which are genomic regions underlying the genetic control of phenotypic variation. In our approach, this means that differences in gene expression between early- and late-flowering RILs reflect differences that are genetically associated with flowering time. The experimental strategy is described in Suppl. Fig. 3-4. This strategy does not allow characterizing the exact genetic architecture of gene expression variation, but it allows the identification of genes whose expression variation is controlled either by flowering-time regulators or by genes located in the genomic vicinity of these regulators. Thereafter, we named these genes Flowering-Time (FT)-dependent genes.

Of a total of 20,553 genes expressed in both the parental genotypes and RIL pools, 6,097 (29%) were differentially expressed between early and late flowering RIL pools, i.e. FT-dependent. As expected, there was a strong excess of genes annotated as having a function in flowering time among FT-dependent genes (223/630 – 36%, hypergeometric test,  $p=3.7e-5$ ). This demonstrated that this strategy effectively highlighted genes whose expression is under the genetic control of flowering time regulators. By contrast, immunity genes were not over-represented among FT-dependent genes. More so, they were clearly under-represented among FT-dependent genes at the second time point of sampling (1.15 fold less abundant than expected by chance at day 28, hypergeometric test,  $p=0.01$ ). Only 19% of all immunity genes were FT-dependent. These genes, however, did not explain the skew towards positive co-variation with flowering time reported in Fig. 2. Immunity genes, whose expression was not differently expressed between RIL pools (i.e. genes whose expression is not dependent on the regulators of flowering time), in fact, tended to be more skewed towards positive correlation coefficients than FT-dependent immunity genes (Kolmogorov-Smirnov test,  $p=0.01$ , Fig. 2A). We observed that FT-dependent flowering time genes did not shift significantly from the distribution of correlation in the rest of the genome (Kolmogorov-Smirnov test,  $p=0.15$ , Fig. 2A). Therefore, the excess of positive expression co-variation with flowering time observed among immunity genes is most strongly driven by genes whose expression level was easily separated from variation in flowering by recombination.

## **Age-regulated immunity genes often show positive co-variation with flowering time**

Immunity genes are often observed to change their activity with age and development (Barton & Boege, 2017). Because we had sampled material at day 14 and day 28 after germination, we could

also separate genes whose expression changed with age (here after named age-regulated genes) from genes with similar expression levels in 14- and 28-day-old plants (see methods). Age-regulated genes were markedly more frequent among annotated immunity genes than among annotated flowering time genes (243/630 – 38% vs 334/691 – 48%, for flowering-time and immunity genes, respectively, Chi Square test,  $p = 7.2e-11$ ). In *A. thaliana*, a so-called age-related resistance is activated in older *A. thaliana* plants, providing them with a immunity barrier against a broad spectrum of pathogens (Rusterucci *et al.*, 2005). In agreement with our findings, the timing of age-related resistance had been reported not to stand under the direct control of flowering time (Wilson *et al.*, 2013).

The subset of genes, whose expression variation in natural populations correlated with flowering time, were also enriched among age-regulated genes (hypergeometric test,  $p = 7.2e-11$ ). Altogether, 4% (348/8565) and 6% (498/7935) of age-independent and age-regulated genes, respectively, were correlated with flowering time at 5% FDR. Immunity genes contributed significantly to this excess, because the expression levels of immunity genes that were age-regulated tended to show a strong skew towards positive correlation with flowering time in natural populations (Fig. 2B, Kolmogorov-Smirnov test,  $p = 0.0009$ ). Our analysis thus indicates that the tendency of immunity genes to co-vary positively with flowering time in natural population is i) not explained by the genetic control of flowering time and ii) increased among genes whose expression is regulated by plant age.

### **Genes activated by elicitors of basal immunity also show an excess of positive correlations with flowering time**

In the above analyses, immunity levels were represented by a set of 731 genes annotated for functions related to immunity. To test whether this trend towards positive covariation between immunity gene expression and flowering time was limited to the set of genes defined by Gene Ontology categories, we analyzed an independent set of immunity-related genes: the 245 genes whose expression is activated in *Arabidopsis* seedlings upon perception of flagellin by the PAMP receptor kinase FLAGELLIN SENSING 2 (FLS2), hereafter named FlaRe genes (Navarro *et al.*, 2004). FlaRe genes coordinate cellular and developmental responses to exposure of molecular signatures of bacteria. Only 10 FlaRe genes overlapped with the immunity-annotated genes used above. We observed that FlaRe genes were enriched among genes showing positive co-variation with flowering time (Fig. 2A-C, Kolmogorov-Smirnov test,  $p < 2.2e-16$ ). This observation remained when accounting for population structure (Suppl. Fig. 1, Kolmogorov-Smirnov test,  $p < 2.2e-16$ ) and was also seen for flowering time measured in the field in a species-wide sample of genotypes (Fig. 2C, Kolmogorov-Smirnov test,  $p < 2.2e-16$ ). When partitioning genes according to whether or not they were FT-dependent or age-regulated, we observed that FT-dependence did not significantly change the distribution of correlation coefficients between FlaRe gene expression and flowering time across natural genotypes (Fig. 2A-B, Kolmogorov-Smirnov test,  $p = 0.15$  and  $p = 0.32$ , for FT-controlled and age-regulated genes, respectively). Nevertheless, FlaRe genes were significantly under-represented among FT-dependent genes, especially at the second sampling time point (1.8-fold less frequent among flowering time controlled genes, hypergeometric test,  $p = 2.24e-05$ ). By contrast, they were over-represented among age-regulated genes (2.1-fold more frequent among age-regulated genes, hypergeometric test,  $p = 2.6e-08$ ). Thus, the positive co-variation reported in Fig. 1A-C is unlikely to result from the pleiotropic action of flowering time regulators on FlaRe genes. This suggests that, like for annotated

immunity genes, alleles attenuating the expression of FlaRe genes were assorted with early-flowering alleles in natural populations and vice versa.

## **Fitness-associated immunity genes show higher correlation coefficients with flowering time**

We further asked whether genes with fitness-relevant variation have expression levels that are more strongly assorted with variation in the timing of flowering. A reciprocal transplant experiment performed in 4 locations throughout Europe identified 866 nucleotide variants in the genome of *A. thaliana* that significantly associated with fitness differences manifested in natural conditions (Fournier-Level *et al.* 2011). Of these variants, 15 mapped to immunity genes and 17 to flowering genes. Association with fitness coincided with a skew towards higher correlation coefficients for immunity genes only (Fig. 3, Kolmogorov-Smirnov test,  $D=0.46$ ,  $p=0.014$  and  $p>0.05$  for immunity and flowering time genes, respectively). One of the immunity genes (AT3G16720), which is activated upon exposure to the fungal PAMP chitin, was FT-dependent but it did not explain this pattern (Kolmogorov-Smirnov test,  $p=0.028$  without AT3G16720). Five of the immunity genes with FT-independent immune functions were age-regulated (AT1G18150, AT1G80840, AT4G01700, AT5G19510, AT5G57220) but this did not explain the pattern either (Kolmogorov-Smirnov test,  $p=0.009$  without these genes). Of the 245 FlaRe genes, 3 contained fitness-associated SNPs. These three genes were among the genes with highest correlation coefficients (AT1G19670:  $\rho=0.397$ , AT3G16720:  $\rho=0.282$ , AT4G38860:  $\rho=0.487$ ). We thus observe that immunity genes that can be most relevant for fitness in natural populations of *A. thaliana* are also genes whose expression levels were most strongly assorted with alleles determining flowering time.

## **DISCUSSION**

### **Evidence for concerted evolution of immunity and flowering time in *A. thaliana***

Our analyses reveal that, in *A. thaliana*, individuals with a shorter vegetative lifespan tend to express immunity genes at a lower level. The bulk analysis of early- and late-flowering RILs shows that this pattern of co-variation results from the combination of independent alleles controlling immunity gene expression and flowering time in natural populations, because these alleles could be separated in the segregating recombinant offspring of an early- and a late-flowering genotype. Because co-variation is also i) robust to the demographic history of the populations and ii) particularly pronounced for immunity-gene variants that associate with fitness, our analyses suggest that this allelic combination is assembled by natural selection. This pattern is confirmed by the examination of genes annotated with a function in immunity and genes observed to respond to elicitation by the common bacterial elicitor flagellin. Our data further suggests that much of the positive co-variation between immunity gene expression and flowering depends on plant age. This factor is of recognized importance in plant immunity (Alcázar *et al.*, 2011; Lozano-Durán & Zipfel, 2015; Carella *et al.*, 2015) and also very well documented in ecological studies (Barton & Boege, 2017). Based on our findings, it is tempting to speculate that variation in age-dependent regulation of immunity may mediate the co-variation we report.



## **Co-variation between immunity and flowering time is not explained by variation in vernalization requirements**

Flowering time variation depends on seasonal fluctuations, on the timing of germination and on the genetics of its control (Lempe *et al.*, 2005; Balasubramanian *et al.*, 2006; Korves *et al.*, 2007; Burghardt *et al.*, 2015; Hu *et al.*, 2017). Genotypes with a strong vernalization requirement, which are thought to have an obligate winter annual strategy, contribute strongly to the variation reported in the literature because they display much delayed flowering in the laboratory (Lempe *et al.*, 2005; Li *et al.*, 2014; Sasaki *et al.*, 2015). The pattern we report, however, is not due to the assortment of immunity gene expression variants with alleles imposing a strong vernalization requirement. Indeed, since we observed that the pattern of co-variation between immunity gene expression and flowering time is magnified in plants whose flowering is not accelerated by cold exposure (Fig. 2A-B), this pattern is not driven by the genotypes requiring vernalization. In addition, the same pattern of co-variation is observed in a global sample of ecotypes, whose flowering time was scored in an outdoor common garden experiment, where plants were naturally vernalized (Fig. 2C). Therefore, we believe that the flowering time measures we used here do capture some of the natural lifespan variation. Future studies will have to confirm that flowering time variation scales with average differences in the lifespan expressed at the location of origin of each genotype.

## **Positive co-variation between lifespan and immunity suggests cascading effect of flowering time adaptation on immunity evolution**

Two alternative scenarios may lead to concerted evolution of flowering time and immunity. First, in conditions where disease pressure is high, both shorter lifespan and stronger immunity can be expected to be advantageous, in order to simultaneously minimize the probability of attack, and maximize the probability of survival in case of attack. Under such scenario, negative co-variation between immunity and lifespan is expected. Alternatively, if lifespan is evolving under evolutionary forces independent of disease pressure, a reduced probability to encounter pathogens will favor mutations transferring energy allocated to immunity into energy allocated to growth. Indeed, defensive functions are known to be costly for the organism (Lochmiller & Deerenberg, 2000; Purrington, 2000). As a consequence the allocation into immunity is predicted to decrease where shorter lifespan evolves. Under this second scenario, a pattern of positive co-variation is expected between immunity and lifespan.

The pattern of co-variation we report here for immunity vs. flowering time is indeed positive and thus lends support to the second scenario. Local adaptation of flowering time is well documented in *A. thaliana* (Le Corre, 2005; Toomajian *et al.*, 2006; Méndez-Vigo *et al.*, 2011; Brachi *et al.*, 2013; Li *et al.*, 2014; Debieu *et al.*, 2013; Burghardt *et al.*, 2015; Vidigal *et al.*, 2016). In addition, several studies support the idea that increased basal level in immunity components improves immunity (Vetter *et al.*, 2012; Boccara *et al.*, 2014). At the same time, variants involved in the surveillance systems directed against pathogenic virulence factors were shown to incur substantial fitness costs (Tian *et al.*, 2003; but see also MacQueen *et al.*, 2016) and variation in basal immunity was negatively correlated with plant growth (Vetter *et al.*, 2012). Our results are thus compatible with an evolutionary scenario in which local adaptation of flowering time has cascading effect on immunity, possibly because a reduction of the plant's lifespan increases the cost/benefit ratio of immunity. This may also explain why genes involved in local adaptation in China are enriched among both flowering time and immunity genes (Zou *et al.* 2017).

However, a positive pattern of covariation could also arise even if the two traits evolve independently. Indeed, it is possible that populations where early flowering is advantageous coincide with populations where disease pressure is lower and *vice versa*. We cannot formally exclude that this scenario does not apply, because too little is known about variation in disease pressure in *A. thaliana* natural populations. Several elements, however, indicate it is unlikely. First, the rapid cycling genotypes are more frequent at intermediate latitudes, where summers are mild and wet (Lempe *et al.*, 2005; Debieu *et al.*, 2013). Since these conditions are also favorable to diseases, it is unlikely that higher disease pressure is found in areas where delayed flowering is more adaptive. Second, it is unlikely that this pattern may be due to herbivore enemies. Indeed, more severe herbivory damage has been observed on early-flowering *A. thaliana* individuals grown in the field (Weinig *et al.*, 2003). This seems to be common in plant species and should select for higher defense among early-flowering genotypes (Carmona *et al.*, 2010). Third, such scenario would assume that variation in disease pressure does not alter the trade-off between survival and reproductive output. This trade-off, however, is central in many models explaining the evolution of the timing of flowering in monocarpic plant species (Mitchell-Olds, 1996; Metcalf & Mitchell-Olds, 2009; Ashworth *et al.*, 2016).

Our results are therefore compatible with a scenario, in which adaptation of life history traits has a cascading effect on the evolution of immunity in *A. thaliana*. These findings do not contradict evidence that a tug of war characterizes the evolution of pathogen-specific components of immunity (Tellier & Brown, 2007; Roux & Bergelson, 2016). Indeed, by examining the basal expression level of a large set of genes involved in the immune reaction, the impact of durable selective forces on general immunity levels can be detected. This approach circumvents the potentially confounding signature left by a recent epidemics on strain-specific R-genes. Indeed, testing phenotypic variation in disease resistance across genotypes with different life-history alleles would probably reveal variation in gene-for-gene resistance, but the pervasive impact of selection fine-tuning energetic costs associated with immunity strategies would remained masked.

Interspecific differences in the investment in defence against herbivory has been often associated with differences in lifespan and growth rate (Endara & Coley, 2010; Kooyers *et al.*, 2017). Future studies will also have to examine whether a similar evolutionary trend has emerged in species that have reshaped their life history to decrease overall vegetative lifespan. Early flowering is actually often favored when the favorable season is shortened (Franks *et al.*, 2007; Kenney *et al.*, 2014). Ongoing selection for early flowering is clearly widespread at temperate latitudes (Munguía-Rosas *et al.*, 2011) and transitions from perennality to annuality occur frequently within phylogenies (Kiefer *et al.*, 2017). Testing whether life span reduction associates with an attenuation of immunity gene expression should therefore be possible in many taxa.

## **The impact of life history evolution on defense systems is expected across all kingdoms**

In animals, the idea that the optimal investment in immunity depends on the life history of a species was also incorporated in evolutionary models (Jokela *et al.*, 2000). For plants and animals alike, resources available to the organism are limited. Energetic demands on growth may compete with those required for mounting immunity or counteracting the negative effects of parasites and pathogens (van Boven & Weissing, 2004; Lazzaro & Little, 2009; Dowling & Simmons, 2009; Seppälä, 2015). Several evolutionary models show that a prolonged lifespan is predicted to favor

resource investment into immunity (Jokela *et al.*, 2000; Medzhitov & Janeway, 2000; van Boven & Weissing, 2004; Miller *et al.*, 2007). As a consequence, changes in life history can mold the evolution of immune systems in animals as well (Van Valen, 1973; Sheldon & Verhulst, 1996; Schulenburg *et al.*, 2009). This theoretical prediction is supported by analyses of sexual dimorphism in the duration of effective breeding: females with increased reproductive longevity show stronger immune-competence but also by a meta-analysis of selection experiments (Rolff, 2007; Nunn *et al.*, 2009, van der Most *et al.* 2011). In frogs, fast developing species were also shown to be more susceptible to infection by trematodes (Johnson *et al.*, 2012). Yet, such studies cannot exclude that longevity and immunity are constrained in their evolution by common regulatory factors or causal inter-dependence. To the best of our knowledge, this study is the first to provide evidence that natural variation in the activity of genes that are important for defeating pathogens is assorted with alleles controlling variation in a life history trait of considerable importance for adaptation. Local adaptation for lifespan should therefore be considered as a potentially important contributor to the maintenance of genetic diversity in immune systems.

## MATERIAL AND METHODS

### Flowering and immunity candidate genes

Gene Ontology (GO) categories were used to identify functionally related genes whose annotation was inferred from experiments, direct assays, physical interaction, mutant phenotype, genetic interactions or from expression patterns. Based on the keyword “flowering” in the TAIR database, 659 flowering time genes were selected. For immunity genes, we united 17 GO categories yielding 731 genes (Suppl. Table S2). For flagellin responsive (FlaRe) genes, we took the set of 245 genes that were activated in seedlings described in (Navarro *et al.*, 2004) (Suppl. Table S2). Subsets of flowering, immunity and FlaRe genes containing fitness-associated single nucleotide polymorphisms (SNPs) were retrieved from Fournier-Level *et al.* 2011.

### Correlation between gene expression and flowering time in a natural population

We analyzed two published sets of natural ecotypes for which both genome-wide expression profiles and flowering time estimates were available. The first dataset comprised 138 lines from Sweden scored for both flowering time (for plants grown at 16h light-8hour dark at constant 16°C) and gene expression in whole rosette collected at the 9-true-leaf stage (Dubin *et al.*, 2015; Sasaki *et al.*, 2015). For this first dataset, gene expression and flowering were determined in the same experiment. The second dataset combined data from two sources. RNA extracted from 7-day old seedlings of 144 genotypes grown on agar plate in long days had been sequenced (Schmitz *et al.*, 2013) and expression levels quantified as quantile normalized fragment numbers per kilobases and million reads (FPKM). For 52 of these genotypes, flowering time, measured in cumulative photothermal units, had been scored in the field (Brachi *et al.*, 2010). Photo-thermal units sum up the combination of temperature and day length and thus provide an estimate of the duration of the favorable season.

Expression counts were  $\log_e + 1$ -transformed to include null values of expression and a Spearman correlation coefficient between flowering time and expression level was computed for each gene. P-values were adjusted for false discovery rate using the `p.adjust` function in R (Benjamini & Hochberg, 1995; Yekutieli & Benjamini, 1999). A Kolmogorov-Smirnov test was used to compare the distribution of Spearman correlation coefficients  $\rho$  of flowering time and immunity genes with the distribution of  $\rho$  for 22,686 genes for which gene expression was quantified. Gene enrichments were tested using hypergeometric tests in R. The GO enrichment analysis was performed with the Gene Set Enrichment Analysis (GSEA) test akin to non-parametric Kolmogorov-Smirnov tests, first described by Subramanian *et al.*, 2005, and implemented in the “topGO” R package (Alexa and Rahnenfuhrer, 2010). We further applied the *elim* procedure, available in this package, which calculates enrichment significance of parent nodes after eliminating genes of significant children nodes. This controls for the dependency among nested parent-child GO categories so that the significance of each enrichment can be interpreted without over-conservative p-value corrections for multiple-testing (Alexa *et al.* 2006). To test the impact of population structure on the correlation, we ran a mixed model with the help of the R package *lme4*. For each gene, we used gene expression level as a dependent variable. Flowering time was used as independent variable and a kinship matrix, generated with a matrix of SNPs segregating among Swedish genotypes (Dubin *et al.*, 2015), was included as random effect. The estimate of the flowering time effect was extracted. This allowed compared the distribution of



estimates observed for the whole genome, the subset of flowering time genes, or the subsets of defense genes.

### **Analysis of gene expression in segregant pools bulked by flowering time**

Seeds of Bur-0, Col-0 and 278 Bur-0xCol-0 Recombinant Inbred Lines (RIL) obtained after 8 generations of selfing were provided by the Arabidopsis Stock Center at INRA Versailles (France, (Simon *et al.*, 2008). Each line was grown individually in six replicates, each in 6cm diameter pots randomly allocated to 24 trays, each containing 35 pots. Seeds were stratified at 5°C for 3 days and grown in growth chambers (Elbanton BV, Holland, equipped with Sylvania Gro-Lux F36W /Gro (T8) fluorescent tubes and Osram 25 W 220 Lumen light bulbs) under long-day conditions (21°C, 16h light, 18°C, 8h dark). Trays were rotated within the chamber every other day. Flowering time was scored as the day to the first open flower. Genotypes of individuals lines were retrieved from Simon *et al.* (2008) and mapping of flowering time recovered the same QTL (not shown).

We selected the 40 RIL in the 15% and 85% quantiles of flowering time for RNA sequencing. Each RIL and the two parental lines were planted in 20 replicates in the conditions described above. At days 14 and 28, the oldest true leaf was flash-frozen in liquid nitrogen. Three pools, each combining 13 RIL, were produced at each time point for early and late lines, for a total of 3 biological replicates, 2 pool types (early and late RIL) and 2 time points (14 and 28 days). For each of the two parental lines, leaves of 12 replicates were pooled for each time point.

RNA was isolated using the TRIzol extraction protocol (ThermoFisher Scientific, USA). DNA traces were removed with the Ambion DNA-free kit (ThermoFisher Scientific, USA) and purified RNA was stored in TE buffer at -80°C. RNA quality and integrity was confirmed with the 2100 Expert Software on a Bioanalyzer (Agilent Technologies, Inc. Waldbronn, Germany). All samples had RNA integrity index (RIN) larger than 8. Single-read libraries were prepared with 1µg of total RNA per sample using the Illumina TruSeq RNA Sample Preparation Kit v2 (Illumina Inc. San Diego, USA) based on poly-A RNA purification. Sequencing of 75bp single reads was performed on the Illumina HighScan SQ system of the Core Facility of the Department of Genetic Epidemiology, Institute of Human Genetics, University of Münster, Germany. Raw data has been deposited in NCBI's Gene Expression Omnibus (Edgar *et al.*, 2002) and are accessible through GEO Series accession number GSE97664.

### **Data analysis of RNA-seq from bulk segregant pools**

In total, 24 RNA libraries were sequenced. Raw sequences were demultiplexed and read quality validated with FastQC. Bad quality base calls were trimmed using the fastx-toolkit (Version 0.013, Li *et al.* 2009). Trimmed reads (FastQ, quality score 33, quality threshold 20 and minimum length 30 base pair) were mapped to the *A. thaliana* TAIR10 annotated transcriptome using Bowtie 2 (version 2-2.0.0-beta6, (Langmead & Salzberg, 2012). Tophat (version-2.0.5.Linux\_x86\_64) was used to discover splice sites and Cufflinks for assembling the transcriptome (Trapnell *et al.*, 2010). In total 411,5 M sequence reads were obtained, with a mean read count per sample of 17,1 M reads. After trimming, 96.5% of the reads were mapped uniquely with a final average coverage of 66 reads per base pair.

We used a custom R script to verify that coverage was uniform across transcripts and confirmed that the RNA sequenced was not degraded. Read counts were calculated by counting the number of reads that mapped uniquely to the corresponding gene (isoforms were not considered). Lowly expressed genes with less than 20 reads over all samples were excluded from the analysis. The

samples clustered by time point of sampling (Fig. 2), with the exception of RNA samples from the Col-0 at 28 days, which resembled more expression levels measured at 14 days, probably because of its early shift to flowering. Differentially expressed (DE) genes were identified by running a nested analysis of sampling time effects within parental genotype (and/or early- and late-flowering leaf pools) with DESeq2 version 1.2.5 (Anders *et al.*, 2013; Love *et al.*, 2014). P-values were corrected for false discovery rate (Benjamini-Hochberg correction; (Benjamini & Hochberg, 1995). DE genes were defined as having an adjusted p-value<0.05. This analysis allowed the identification of genes showing differential expression between the parents (Suppl. Table S3) and genes showing flowering time dependent expression (differential expression between early and late flowering RIL pools, i.e. FT-regulated genes Suppl. Table S4) both at day 14 and at day 28. We performed further analyses to disentangle significant sources of gene expression variation. To test whether gene expression was significantly modified at each time point, separate tests were performed for each parental genotype and RIL pool type. Genes differentially regulated at 14- and 28-days in Bur-0 (adjusted p-value<0.05) were defined as age-regulated genes (Suppl. Table S5). To determine whether one or both sampling time points drove significant differential expression, separate tests were performed for each time point (not shown).

### Confirmation with qRT PCR

We confirmed gene expression levels for 11 selected immunity genes with differential expression between Bur-0 and Col-0 or early vs. late flowering pools (log2-fold change > 1.5) using RT-PCR. We followed standard protocols and used RNA Helicase (AT1G58060), Protein Phosphatase 2A Subunit A3 (PP2AA3) and transcript AT5G12240 as control genes. Gene expression based on RNA sequencing and RT-PCR were strongly correlated (Pearson correlation,  $0.58 < R < 0.96$ , max p < 0.01).

### Figure legends

**Figure 1:** Distribution of Spearman correlation coefficients between expression levels of each expressed *A. thaliana* gene and flowering time. Grey: All expressed genes; Blue: Genes annotated as flowering time genes (FT genes); Red: Genes annotated as immunity genes; Pink: Flagellin-responsive (FlaRe) genes (Navarro *et al.* 2004). **A.** For 138 Swedish genotypes; **B.** Analysis restricted to 51 Swedish genotypes showing correlated flowering time at 10°C and 16°C; **C.** Species-wide sample of 52 genotypes. Distribution for each group of genes was compared to the genome-wide distribution (black double-head arrow) with a Kolmogorov-Smirnov test. P-values are given in the color corresponding to the gene class. Spearman correlation coefficients were computed between expression levels of each of 23,511 expressed *A. thaliana* genes, reported in Durbin *et al.* 2015 for 9th leaf seedlings, and flowering time measured in the same condition for 51 genotypes originating from natural populations in Sweden (Sasaki *et al.* 2015). \*\*\* p < 0.001.

**Figure 2:** Distribution of Spearman correlation coefficients between gene expression level and flowering time. **A.** Partition of genes controlled by flowering time (hatched boxes with blue border) vs independent from flowering time (uniform boxes with black border); **B.** Partition of

genes controlled by development (hatched boxes with orange border) vs independent from development (uniform boxes with black border). Inserts in the top of the figure illustrates how these gene classes were defined. Immunity genes that are not controlled by flowering time but controlled by development tend to have higher correlation coefficients of natural variation for expression with natural variation for flowering time. Grey: All expressed genes; Blue: Genes annotated as flowering time genes (FT genes); Red: Genes annotated as immunity genes; Pink: Flagellin-responsive (FlaRe) genes (Navarro *et al.* 2004). P-values for Kolmogorov-Smirnov test comparing the distribution of genes within each category that are independent of or regulated by **A.** flowering time or **B.** age are shown when significant. Note that only 12 FlaRe genes are controlled by flowering time in our experiment. Spearman correlation coefficients were computed between expression levels of each of 23,511 expressed *A. thaliana* genes, reported in Durbin *et al.* 2015 for 9th leaf seedlings, and flowering time measured in the same condition for 51 genotypes originating from natural populations in Sweden (Sasaki *et al.* 2015). \*  $p < 0.05$ , \*\*\*  $p < 0.001$ .

**Figure 3:** Distribution of Spearman correlation coefficients between gene expression level and flowering time. All expressed genes –uniform boxes with black border- vs. genes with fitness-associated SNPs in Fournier-Level *et al.* (2011), - hatched boxes with purple border-. Grey: All expressed genes; Blue: Genes annotated as flowering time genes (FT genes); Red: Genes annotated as immunity genes. Immunity genes that carry SNPs associating with fitness tend to have higher correlation coefficients of natural variation for expression with natural variation for flowering time. P-values for Kolmogorov-Smirnov test comparing the distribution for genes within each category are shown when significant. Spearman correlation coefficients were computed between expression levels of each of 23,511 expressed *A. thaliana* genes, reported in Durbin *et al.* 2015 for 9th leaf seedlings, and flowering time measured in the same condition for 51 genotypes originating from natural populations in Sweden (Sasaki *et al.* 2015). \*  $p < 0.05$ .

## Supplementary Tables

**Suppl. Table 1:** GO categories enriched among genes correlating either positively or negatively with flowering time.

**Suppl. Table 2:** List of immunity genes and GO categories (only gene annotations based on experimentally validated open reading frames were considered). FlaRe genes and flowering time genes used in the study.

**Suppl. Table 3:** FT-dependent genes (DE between early and late flowering RIL pools). Output of gene expression analysis includes mean read count (FPKM), log2 fold-change, Standard error of the log2 fold-change; p-value and FDR adjusted p-value. FT-dependent genes have FDR adjusted p-values  $< 0.05$ .

**Suppl. Table 4:** Differentially expressed genes between Col-0 and Bur-0. Output of gene expression analysis includes mean read count (FPKM), log2 fold-change, Standard error of the log2 fold-change; p-value and FDR adjusted p-value. Genes differently regulated between Col-0 and Bur-0 have FDR adjusted p-values  $< 0.05$ .

**Suppl. Table 5:** Age-regulated genes defined as differential gene expression changes in Bur-0 between 14- and 28-days. Output of gene expression analysis includes mean read count (FPKM), log2 fold-change, Standard error of the log2 fold-change; p-value and FDR adjusted p-value. FT-dependent genes have FDR adjusted p-values <0.05.

## Supplementary Figures

**Suppl. Figure 1:** Distribution of estimated effect of flowering time as explanatory factor of gene expression variation, taking into account population structure between Swedish genotypes of group A (Group A genotypes advance their flowering at 16°C compared to 10°C and show correlated flowering at 10°C and 16°C, Sasaki *et al.* 2015). The trend shown in Figure 1 is maintained after accounting for population structure. P-values for Kolmogorov-Smirnov test comparing estimate distribution for the gene subset compared to the genome-wide distribution are given. **A.** Density distribution, **B.** Boxplots.

**Suppl. Figure 2:** Distribution of correlation coefficients between gene expression and flowering time restricted to the genes showing differential expression in Col-0 vs. Bur-0. Expression differences between the genotypes Col-0 and Bur-0 recapitulate the pattern reported within natural populations in Figure 1. Distribution of Spearman correlation coefficients between gene expression level and flowering time for the set of genotypes showing consistent differences in flowering at 10°C and 16°C (Sasaki *et al.* 2015). This analysis is restricted to the 6980 genes showing differential expression between Col-0 and Bur-0. Immunity genes have a stronger skew in correlation coefficients with flowering time. Spearman correlation coefficients were computed between expression level of each of 6980 expressed *A. thaliana* genes, reported in Durbin *et al.* 2015 for 9th leaf seedlings, and flowering time measured in the same condition. Genotypes originate from natural populations in Sweden (Sasaki *et al.* 2015). Black line: All expressed genes, Blue lines: Gene annotated as flowering time genes (FT genes), Red lines: Genes annotated as immunity genes, Pink line: Flagellin-responsive (FlaRe) genes (Navarro *et al.* 2004).

**Suppl. Figure 3:** Bulk-sequencing strategy used to identify FT-dependent genes, i.e. genes whose expression is genetically controlled by flowering time regulators or by genes located closely to and therefore co-segregating with flowering time regulators.

**Suppl. Figure 4:** Heatmap of the correlation in gene expression variation for the 1000 genes showing highest expression variation between samples. Clustering of gene expression levels shows that samples partition by genotype (Col-0, Bur-0), sampling time point (14d, 28d), and flowering time (Early Fl.: Early flowering RIL pool, Late Fl.: Late flowering RIL pool).

**Supplementary datasets:** For each expressed genes, Spearman correlation coefficients and their FDR significance presented separately for each dataset (whole Swedish populations, only vernalization-independent Swedish line, species-wide dataset).



## Acknowledgements

This research was supported by the Deutsche Forschung Gesellschaft (DFG) in the realm of SPP1530 grant ME 2742/2-1, and by the European Research Council with Grant 648617 “AdaptoSCOPE”. Raw data has been deposited in NCBI's Gene Expression Omnibus (Edgar *et al.* 2002) and are accessible through GEO Series accession number GSE97664.

## References

- Alcázar R, Reymond M, Schmitz G, de Meaux J. 2011.** Genetic and evolutionary perspectives on the interplay between plant immunity and development. *Current opinion in plant biology* **14**: 378–384.
- Anders S, McCarthy DJ, Chen Y, Okoniewski M, Smyth GK, Huber W, Robinson MD. 2013.** Count-based differential expression analysis of RNA sequencing data using R and Bioconductor. *Nature protocols* **8**: 1765–1786.
- Andrés F, Coupland G. 2012.** The genetic basis of flowering responses to seasonal cues. *Nature Reviews Genetics* **13**: 627–639.
- Ashworth MB, Walsh MJ, Flower KC, Vila Aiub MM, Powles SB. 2016.** Directional selection for flowering time leads to adaptive evolution in *Raphanus raphanistrum* (Wild radish). *Evolutionary Applications* **9**: 619–629.
- Balasubramanian S, Sureshkumar S, Agrawal M, Michael TP, Wessinger C, Maloof JN, Clark R, Warthmann N, Chory J, Weigel D. 2006.** The PHYTOCHROME C photoreceptor gene mediates natural variation in flowering and growth responses of *Arabidopsis thaliana*. *Nature Genetics* **38**: 711–715.
- Barton KE, Boege K. 2017.** Future directions in the ontogeny of plant defence: understanding the evolutionary causes and consequences (T Turlings, Ed.). *Ecology Letters* **20**: 403–411.
- Benjamini Y, Hochberg Y. 1995.** Controlling the False Discovery Rate - a Practical and Powerful Approach to Multiple Testing. *Journal of the Royal Statistical Society Series B* **57**: 289–300.
- Bergelson J, Roux F. 2010.** Towards identifying genes underlying ecologically relevant traits in *Arabidopsis thaliana*. *Nature Reviews Genetics* **11**: 867–879.
- Bergelson J, Dwyer G, Emerson JJ. 2001.** Models and data on plant-enemy coevolution. *Annual Review of Genetics* **35**: 469–499.
- Boccara M, Sarazin A, Thiébeauld O, Jay F, Voinnet O, Navarro L, Colot V. 2014.** The *Arabidopsis* miR472-RDR6 Silencing Pathway Modulates PAMP- and Effector-Triggered Immunity through the Post-transcriptional Control of Disease Resistance Genes. *PLoS Pathogens* **10**: e1003883–16.
- Brachi B, Faure N, Horton M, Flahauw E, Vazquez A, Nordborg M, Bergelson J, Cuguen J, Roux F. 2010.** Linkage and association mapping of *Arabidopsis thaliana* flowering time in nature. *PLoS Genetics* **6**: e1000940.
- Brachi B, Villoutreix R, Faure N, Hautekèete N, Piquot Y, Pauwels M, Roby D, Cuguen J, Bergelson J, Roux F. 2013.** Investigation of the geographical scale of adaptive phenological

748 variation and its underlying genetics in *Arabidopsis thaliana*. *Molecular Ecology* **22**: 4222–4240.

749 **Burghardt LT, Metcalf CJE, Wilczek AM, Schmitt J, Donohue K. 2015.** Modeling the  
750 influence of genetic and environmental variation on the expression of plant life cycles across  
751 landscapes. *The American Naturalist* **185**: 212–227.

752 **Carella P, Wilson DC, Cameron RK. 2015.** Some things get better with age: differences in  
753 salicylic acid accumulation and immunity signaling in young and mature *Arabidopsis*. *Frontiers in*  
754 *Plant Science* **5**: 1001.

755 **Carmona D, Lajeunesse MJ, Johnson MTJ. 2010.** Plant traits that predict resistance to  
756 herbivores. *Functional Ecology* **25**: 358–367.

757 **Chiang GCK, Barua D, Dittmar E, Kramer EM, de Casas RR, Donohue K. 2013.**  
758 Pleiotropy in the wild: the dormancy gene DOG1 exerts cascading control on life cycles. *Evolution*  
759 **67**: 883–893.

760 **Chisholm ST, Coaker G, Day B, Staskawicz BJ. 2006.** Host-microbe interactions: shaping the  
761 evolution of the plant immune response. *Cell* **124**: 803–814.

762 **Davila Olivas NH, Frago E, Thoen MPM, Kloth KJ, Becker FFM, van Loon JJA, Gort G,**  
763 **Keurentjes JJB, van Heerwaarden J, Dicke M. 2017.** Natural variation in life history strategy  
764 of *Arabidopsis thaliana* determines stress responses to drought and insects of different feeding  
765 guilds. *Molecular Ecology* **26**: 2959–2977.

766 **de Meaux J, Mitchell-Olds T. 2003.** Evolution of plant resistance at the molecular level:  
767 ecological context of species interactions. *Heredity* **91**: 345–352.

768 **Debieu M, Tang C, Stich B, Sikosek T, Effgen S, Josephs E, Schmitt J, Nordborg M,**  
769 **Koornneef M, de Meaux J. 2013.** Co-variation between seed dormancy, growth rate and  
770 flowering time changes with latitude in *Arabidopsis thaliana*. *PLoS ONE* **8**: e61075.

771 **Develey-Riviere MP, Galiana E. 2007.** Resistance to pathogens and host developmental stage:  
772 a multifaceted relationship within the plant kingdom. *New Phytologist* **175**: 405–416.

773 **Dowling DK, Simmons LW. 2009.** Reactive oxygen species as universal constraints in life-  
774 history evolution. *Proc Biol Sci* **276**: 1737–1745.

775 **Dubin MJ, Zhang P, Meng D, Remigereau M-S, Osborne EJ, Paolo Casale F, Drewe P,**  
776 **Kahles A, Jean G, Vilhjálmsson B, et al. 2015.** DNA methylation in *Arabidopsis* has a genetic  
777 basis and shows evidence of local adaptation. *eLife* **4**: e05255.

778 **Dybdahl MF, Jenkins CE, Nuismer SL. 2014.** Identifying the Molecular Basis of Host-Parasite  
779 Coevolution: Merging Models and Mechanisms. *The American Naturalist* **184**: 1–13.

780 **Edgar R, Domrachev M, Lash AE. 2002.** Gene Expression Omnibus: NCBI gene expression  
781 and hybridization array data repository. *Nucleic Acids Research* **30**: 207–210.

782 **Endara M-J, Coley PD. 2010.** The resource availability hypothesis revisited: a meta-analysis.  
783 *Functional Ecology* **25**: 389–398.

784 **Eulgem T. 2005.** Regulation of the *Arabidopsis* immunity transcriptome. *Trends in Plant Science*  
785 **10**: 71–78.

786 **Fan M, Bai M-Y, Kim J-G, Wang T, Oh E, Chen L, Park CH, Son S-H, Kim S-K,**  
787 **Mudgett MB, et al. 2014.** The bHLH Transcription Factor HBI1 Mediates the Trade-Off  
788 between Growth and Pathogen-Associated Molecular Pattern-Triggered Immunity in  
789 *Arabidopsis*. *The Plant cell* **26**: 828–841.

790 **Fournier-Level A, Korte A, Cooper MD, Nordborg M, Schmitt J, Wilczek AM. 2011.** A  
791 map of local adaptation in *Arabidopsis thaliana*. *Science* **334**: 86–89.

792 **Fournier-Level A, Perry EO, Wang JA, Braun PT, Migneault A, Cooper MD, Metcalf**  
793 **CJE, Schmitt J. 2016.** Predicting the evolutionary dynamics of seasonal adaptation to novel  
794 climates in *Arabidopsis thaliana*. *Proceedings of the National Academy of Sciences* **113**: E2812–21.

795 **Fournier-Level A, Wilczek AM, Cooper MD, Roe JL, Anderson J, Eaton D, Moyers BT,**  
796 **Petipas RH, Schaeffer RN, Pieper B, et al. 2013.** Paths to selection on life history loci in  
797 different natural environments across the native range of *Arabidopsis thaliana*. *Molecular Ecology* **22**:  
798 3552–3566.

799 **Franks SJ, Sim S, Weis AE. 2007.** Rapid evolution of flowering time by an annual plant in  
800 response to a climate fluctuation. *Proceedings of the National Academy of Sciences of the United States of*  
801 *America* **104**: 1278–1282.

802 **Garnier E. 1992.** Growth Analysis of Congeneric Annual and Perennial Grass Species. *The*  
803 *Journal of Ecology* **80**: 665.

804 **Hancock AM, Brachi B, Faure N, Horton MW, Jarymowycz LB, Sperone FG, Toomajian**  
805 **C, Roux F, Bergelson J. 2011.** Adaptation to climate across the *Arabidopsis thaliana* genome.  
806 *Science* **334**: 83–86.

807 **Herms DA, Mattson WJ. 1992.** The Dilemma of Plants - to Grow or Defend. *Quarterly Review of*  
808 *Biology* **67**: 283–335.

809 **Hu J, Lei L, de Meaux J. 2017.** Temporal fitness fluctuations in experimental *Arabidopsis*  
810 *thaliana* populations. *PLoS ONE* **12**(6): e0178990.

811 **Jiménez-Góngora T, Kim S-K, Lozano-Durán R, Zipfel C. 2015.** Flg22-Triggered Immunity  
812 Negatively Regulates Key BR Biosynthetic Genes. *Frontiers in Plant Science* **6**: 303.

813 **Johnson PTJ, Rohr JR, Hoverman JT, Kellermanns E, Bowerman J, Lunde KB. 2012.**  
814 Living fast and dying of infection: host life history drives interspecific variation in infection and  
815 disease risk. *Ecology Letters* **15**: 235–242.

816 **Jokela J, Schmid-Hempel P, Rigby MC. 2000.** Dr. Pangloss restrained by the Red Queen -  
817 steps towards a unified defence theory. *Oikos* **89**: 267–274.

818 **Jones JDG, Dangl JL. 2006.** The plant immune system. *Nature* **444**: 323–329.

819 **Karasov TL, Kniskern JM, Gao L, DeYoung BJ, Ding J, Dubiella U, Lastra RO, Nallu S,**  
820 **Roux F, Innes RW, et al. 2014.** The long-term maintenance of a resistance polymorphism  
821 through diffuse interactions. *Nature* **512**: 436–440.

822 **Kenney AM, McKay JK, Richards JH, JUENGER TE. 2014.** Direct and indirect selection on  
823 flowering time, water-use efficiency (WUE,  $\delta^{13}C$ ), and WUE plasticity to drought in *Arabidopsis*  
824 *thaliana*. *Ecology and evolution* **4**: 4505–4521.

- 825 **Kerwin R, Feusier J, Corwin J, Rubin M, Lin C, Muok A. 2015.** Natural genetic variation in  
826 *Arabidopsis thaliana* immunity metabolism genes modulates field fitness. *eLife*. 4: e05604.
- 827 **Kiefer C, Severing E, Karl R, Bergonzi S, Koch M, Tresch A, Coupland G. 2017.**  
828 Divergence of annual and perennial species in the Brassicaceae and the contribution of cis-acting  
829 variation at FLC orthologues. *Molecular Ecology* **26(13)**:3437–3457.
- 830 **Kooyers NJ, Blackman BK, Holeski LM. 2017.** Optimal immunity theory explains deviations  
831 from latitudinal herbivory immunity hypothesis. *Ecology* **98**: 1036–1048.
- 832 **Korves TM, Bergelson J. 2003.** A developmental response to pathogen infection in  
833 *Arabidopsis*. *Plant Physiology* **133**: 339–347.
- 834 **Korves TM, Schmid KJ, Caicedo AL, Mays C, Stinchcombe JR, Purugganan MD,**  
835 **Schmitt J. 2007.** Fitness effects associated with the major flowering time gene FRIGIDA in  
836 *Arabidopsis thaliana* in the field. *American Naturalist* **169**: E141–E157.
- 837 **Laine A-L, Burdon JJ, Dodds PN, Thrall PH. 2010.** Spatial variation in disease resistance:  
838 from molecules to metapopulations. *Journal of Ecology* **99**: 96–112.
- 839 **Langmead B, Salzberg SL. 2012.** Fast gapped-read alignment with Bowtie 2. *Nature Methods* **9**:  
840 357–359.
- 841 **Lasky JR. 2012.** Characterizing genomic variation of *Arabidopsis thaliana*: the roles of geography  
842 and climate. *Molecular Ecology* **21**: 5512–5529.
- 843 **Lazzaro BP, Little TJ. 2009.** Immunity in a variable world. *Philosophical Transactions of the Royal*  
844 *Society B* **364**: 15–26.
- 845 **Le Corre V. 2005.** Variation at two flowering time genes within and among populations of  
846 *Arabidopsis thaliana*: comparison with markers and traits. *Molecular Ecology* **14**: 4181–4192.
- 847 **Lee YK, Mazmanian SK. 2010.** Has the Microbiota Played a Critical Role in the Evolution of  
848 the Adaptive Immune System? *Science* **330**: 1768–1773.
- 849 **Lempe J, Balasubramanian S, Sureshkumar S, Singh A, Schmid M, Weigel D. 2005.**  
850 Diversity of Flowering Responses in Wild *Arabidopsis thaliana* Strains. *PLoS Genetics* **1**: e6.
- 851 **Li P, Filiault D, Box MS, Kerdauffrec E, van Oosterhout C, Wilczek AM, Schmitt J,**  
852 **McMullan M, Bergelson J, Nordborg M, et al. 2014b.** Multiple FLC haplotypes defined by  
853 independent cis-regulatory variation underpin life history diversity in *Arabidopsis thaliana*. *Genes &*  
854 *Development* **28**: 1635–1640.
- 855 **Liow LH, Van Valen L, Stenseth NC. 2011.** Red Queen: from populations to taxa and  
856 communities. *Trends in Ecology & Evolution* **26**: 349–358.
- 857 **Lochmiller RL, Deerenberg C. 2000.** Trade-offs in evolutionary immunology: just what is the  
858 cost of immunity? *Oikos* **88**: 87–98.
- 859 **Love MI, Huber W, Anders S. 2014.** Moderated estimation of fold change and dispersion for  
860 RNA-seq data with DESeq2. *Genome Biology* **15**: 550.
- 861 **Lozano-Durán R, Zipfel C. 2015.** Trade-off between growth and immunity: role of  
862 brassinosteroids. *Trends in Plant Science* **20**: 12–19.



- 863 Lyons R, Rusu A, Stiller J, Powell J, Manners JM, Kazan K. 2015. Investigating the association  
864 between flowering time and defense in the *Arabidopsis thaliana*-*Fusarium oxysporum* interaction.  
865 PLoS One 10(6):e0127699.
- 866 MacQueen A, Sun X, Bergelson J. 2016. Genetic architecture and pleiotropy shape costs of  
867 *Rps2*-mediated resistance in *Arabidopsis thaliana*. *Nature Plants* 2: 1–8.
- 868 Maekawa T, Kufer TA, Schulze-Lefert P. 2011. NLR functions in plant and animal immune  
869 systems: so far and yet so close. *Nature Immunology* 12: 817–826.
- 870 Martinez C, Pons E, Prats G, Leon J. 2004. Salicylic acid regulates flowering time and links  
871 defence responses and reproductive development. *Plant Journal* 37: 209–217.
- 872 Matthew Ogburn R, Edwards EJ. 2015. Life history lability underlies rapid climate niche  
873 evolution in the angiosperm clade Montiaceae. *Molecular Phylogenetics and Evolution* 92: 181–192.
- 874 Medzhitov R, Janeway C. 2000. The Toll receptor family and microbial recognition. *Trends in*  
875 *Microbiology* 8: 452–456.
- 876 Metcalf CJE, Mitchell-Olds T. 2009. Life history in a model system: opening the black box  
877 with *Arabidopsis thaliana*. *Ecology Letters* 12: 593–600.
- 878 Metzger CMJA, Luijckx P, Bento G, Mariadassou M, Ebert D. 2016. The Red Queen lives:  
879 Epistasis between linked resistance loci. *Evolution* 70: 480–487.
- 880 Méndez-Vigo B, Picó FX, Ramiro M, Martínez-Zapater JM, Alonso-Blanco C. 2011.  
881 Altitudinal and climatic adaptation is mediated by flowering traits and FRI, FLC, and PHYC  
882 genes in *Arabidopsis*. *Plant physiology* 157: 1942–1955.
- 883 Michaels SD, He Y, Scortecci KC, Amasino RM. 2003. Attenuation of FLOWERING  
884 LOCUS C activity as a mechanism for the evolution of summer-annual flowering behavior in  
885 *Arabidopsis*. *Proceedings of the National Academy of Sciences of the United States of America* 100: 10102–  
886 10107.
- 887 Miller MR, White A, Boots M. 2007. Host life span and the evolution of resistance  
888 characteristics. *Evolution* 61: 2–14.
- 889 Mitchell CE, Power AG. 2003. Release of invasive plants from fungal and viral pathogens.  
890 *Nature* 421: 625–627.
- 891 Mitchell CE, Blumenthal D, Jarošík V, Puckett EE, Pyšek P. 2010. Controls on pathogen  
892 species richness in plants' introduced and native ranges: roles of residence time, range size and  
893 host traits. *Ecology Letters* 13: 1525–1535.
- 894 Mitchell-Olds T. 1996. Pleiotropy causes long-term genetic constraints on life-history evolution  
895 in *Brassica rapa*. *Evolution* 50: 1849–1858.
- 896 Mitchell-Olds T, Schmitt J. 2006. Genetic mechanisms and evolutionary significance of natural  
897 variation in *Arabidopsis*. *Nature* 441: 947–952.
- 898 Moeller DA, Tiffin P. 2005. Genetic diversity and the evolutionary history of plant immunity  
899 genes in two species of *Zea*. *Molecular Biology and Evolution* 22: 2480–2490.
- 900 Montesinos-Navarro A, Wig J, Picó FX, Tonsor SJ. 2011. *Arabidopsis thaliana* populations

- 901 show clinal variation in a climatic gradient associated with altitude. *New Phytologist* **189**: 282–294.
- 902 **Munguía-Rosas MA, Ollerton J, Parra-Tabla V, De-Nova JA. 2011.** Meta-analysis of  
903 phenotypic selection on flowering phenology suggests that early flowering plants are favoured.  
904 *Ecology Letters* **14**: 511–521.
- 905 **Navarro L, Zipfel C, Rowland O, Keller I, Robatzek S, Boller T, Jones JDG. 2004.** The  
906 transcriptional innate immune response to flg22. Interplay and overlap with Avr gene-dependent  
907 immunity responses and bacterial pathogenesis. *Plant physiology* **135**: 1113–1128.
- 908 **Nunn CL, Lindenfors P, Pursall ER, Rolff J. 2009.** On sexual dimorphism in immune  
909 function. *Philosophical Transactions of the Royal Society B: Biological Sciences* **364**: 61–69.
- 910 **Pagan I, Alonso-Blanco C, Garcia-Arenal F. 2008.** Host responses in life-history traits and  
911 tolerance to virus infection in *Arabidopsis thaliana*. *PLoS Pathogens* **4**(8): e1000124.
- 912 **Pajeroska-Mukhtar K, Stich B, Achenbach U, Ballvora A, Lubeck J, Strahwald J, Tacke  
913 E, Hofferbert HR, Ilarionova E, Bellin D, et al. 2009.** Single Nucleotide Polymorphisms in the  
914 Allene Oxide Synthase 2 Gene Are Associated With Field Resistance to Late Blight in  
915 Populations of Tetraploid Potato Cultivars. *Genetics* **181**: 1115–1127.
- 916 **Parker IM, Gilbert GS. 2004.** The Evolutionary Ecology of Novel Plant-Pathogen Interactions.  
917 *Annual Review of Ecology, Evolution and Systematics* **35**: 675–700.
- 918 **Parker IM, Saunders M, Bontrager M, Weitz AP, Hendricks R, Magarey R, Suiter K,  
919 Gilbert GS. 2015.** Phylogenetic structure and host abundance drive disease pressure in  
920 communities. *Nature* **520**: 542–544.
- 921 **Pieterse CMJ, Van der Does D, Zamioudis C, Leon-Reyes A, Van Wees SCM. 2012.**  
922 Hormonal modulation of plant immunity. *Annual review of cell and developmental biology* **28**: 489–521.
- 923 **Purrington CB. 2000.** Costs of resistance. *Current opinion in plant biology* **3**: 305–308.
- 924 **Ravensdale M, Nemri A, Thrall PH, Ellis JG, Dodds PN. 2010.** Co-evolutionary interactions  
925 between host resistance and pathogen effector genes in flax rust disease. *Molecular Plant Pathology*  
926 **12**: 93–102.
- 927 **Rolff J. 2007.** Why did the acquired immune system of vertebrates evolve? *Developmental and*  
928 *comparative immunology* **31**: 476–482.
- 929 **Roux F, Bergelson J. 2016.** The Genetics Underlying Natural Variation in the Biotic  
930 Interactions of *Arabidopsis thaliana*: The Challenges of Linking Evolutionary Genetics and  
931 Community Ecology. *Current topics in developmental biology* **119**: 111–156.
- 932 **Rusterucci C, Zhao Z, Haines K, Mellersh D, Neumann A, Cameron RK. 2005.** Age-  
933 related resistance to *Pseudomonas syringae* pv. tomato is associated with the transition to  
934 flowering in *Arabidopsis* and is effective against *Peronospora parasitica*. *Physiological and Molecular*  
935 *Plant Pathology* **66**: 222–231.
- 936 **Sasaki E, Zhang P, Atwell S, Meng D, Nordborg M. 2015.** ‘Missing’ G x E Variation  
937 Controls Flowering Time in *Arabidopsis thaliana*. *PLoS Genetics* **11**: e1005597.
- 938 **Schmitz RJ, Schultz MD, Urich MA, Nery JR, Pelizzola M, Libiger O, Alix A, McCosh  
939 RB, Chen H, Schork NJ, et al. 2013.** Patterns of population epigenomic diversity. *Nature* **495**:

- 940 193–198.
- 941 **Schulenburg H, Kurtz J, Moret Y, Siva-Jothy MT. 2009.** Introduction. Ecological  
942 immunology. *Philosophical Transactions of the Royal Society B: Biological Sciences* **364**: 3–14.
- 943 **Seppälä O. 2015.** Natural selection on quantitative immune defence traits: a comparison between  
944 theory and data. *Journal of Evolutionary Biology* **28**: 1–9.
- 945 **Sheldon BC, Verhulst S. 1996.** Ecological immunology: Costly parasite defences and trade-offs  
946 in evolutionary ecology. *Trends in Ecology & Evolution* **11**: 317–321.
- 947 **Siddle KJ, Quintana-Murci L. 2014.** The Red Queen's long race: human adaptation to  
948 pathogen pressure. *Current Opinion in Genetics & Development* **29**: 31–38.
- 949 **Simon M, Loudet O, Durand S, Bérard A, Brunel D, Sennesal F-X, Durand-Tardif M,**  
950 **Pelletier G, Camilleri C. 2008.** Quantitative Trait Loci Mapping in Five New Large  
951 Recombinant Inbred Line Populations of *Arabidopsis thaliana* Genotyped With Consensus Single-  
952 Nucleotide Polymorphism Markers. *Genetics* **178**: 2253–2264.
- 953 **Stich B, Mohring J, Piepho H-P, Heckenberger M, Buckler ES, Melchinger AE. 2008.**  
954 Comparison of Mixed-Model Approaches for Association Mapping. *Genetics* **178**: 1745–1754.
- 955 **Tank DC, Olmstead RG. 2008.** From annuals to perennials: phylogeny of subtribe Castillejinae  
956 (Orobanchaceae). *American Journal of Botany* **95**: 608–625.
- 957 **Tellier A, Brown JKM. 2007.** Polymorphism in multilocus host parasite coevolutionary  
958 interactions. *Genetics* **177**: 1777–1790.
- 959 **Thines BC, Youn Y, Duarte MI, Harmon FG. 2014.** The time of day effects of warm  
960 temperature on flowering time involve PIF4 and PIF5. *Journal of Experimental Botany* **65**: 1141–  
961 1151.
- 962 **Tian D, Traw MB, Chen JQ, Kreitman M, Bergelson J. 2003.** Fitness costs of R-gene-  
963 mediated resistance in *Arabidopsis thaliana*. *Nature* **423**: 74–77.
- 964 **Toomajian C, Hu TT, Aranzana MJ, Lister C, Tang C, Zheng H, Zhao K, Calabrese P,**  
965 **Dean C, Nordborg M. 2006.** A Nonparametric Test Reveals Selection for Rapid Flowering in  
966 the *Arabidopsis* Genome. *PLoS Biology* **4**: e137.
- 967 **Trapnell C, Williams BA, Pertea G, Mortazavi A, Kwan G, van Baren MJ, Salzberg SL,**  
968 **Wold BJ, Pachter L. 2010.** Transcript assembly and quantification by RNA-Seq reveals  
969 unannotated transcripts and isoform switching during cell differentiation. *Nature Biotechnology* **28**:  
970 516–520.
- 971 **van Boven M, Weissing FJ. 2004.** The evolutionary economics of immunity. *American Naturalist*  
972 **163**: 277–294.
- 973 **van der Most PJ, de Jong B, Parmentier HK, Verhulst S, 2011.** Trade-off between growth  
974 and immune function: a meta-analysis of selection experiments. *Functional Ecology* 2011, 25: 74-80.
- 975 **Van Valen L. 1973.** A new evolutionary law. *Evolutionary Theory* **1**: 1—30.
- 976 **Vetter MM, Kronholm I, He F, Haweker H, Reymond M, Bergelson J, Robatzek S, de**  
977 **Meaux J. 2012.** Flagellin Perception Varies Quantitatively in *Arabidopsis thaliana* and Its Relatives.

978 *Molecular Biology and Evolution* **29**: 1655–1667.

979 **Vidigal DS, Marques ACSS, Willems LAJ, Buijs G, Méndez-Vigo B, Hilhorst HWM,**  
980 **Bentsink L, Picó FX, Alonso-Blanco C. 2016.** Altitudinal and climatic associations of seed  
981 dormancy and flowering traits evidence adaptation of annual life cycle timing in *Arabidopsis*  
982 *thaliana*. *Plant, Cell & Environment* **39**: 1737–1748.

983 **Weinig C, Stinchcombe JR, Schmitt J. 2003.** Evolutionary genetics of resistance and tolerance  
984 to natural herbivory in *Arabidopsis thaliana*. *Evolution* **57**: 1270–1280.

985 **Whalen MC. 2005.** Host defence in a developmental context. *Molecular Plant Pathology* **6**: 347–  
986 360.

987 **Wilczek AM, Roe JL, Knapp MC, Cooper MD, Lopez-Gallego C, Martin LJ, Muir CD,**  
988 **Sim S, Walker A, Anderson J, et al. 2009.** Effects of genetic perturbation on seasonal life history  
989 plasticity. *Science* **323**: 930–934.

990 **Wilson DC, Carella P, Isaacs M, Cameron RK. 2013.** The floral transition is not the  
991 developmental switch that confers competence for the *Arabidopsis* age-related resistance  
992 response to *Pseudomonas syringae* pv. tomato. *Plant Molecular Biology* **83**: 235–246.

993 **Yekutieli D, Benjamini Y. 1999.** Resampling-based false discovery rate controlling multiple test  
994 procedures for correlated test statistics. *Journal of Statistical Planning and Inference* **82**: 171–196.

995 **Yu J, Pressoir G, Briggs WH, Vroh Bi I, Yamasaki M, Doebley JF, McMullen MD, Gaut**  
996 **BS, Nielsen DM, Holland JB, et al. 2006.** A unified mixed-model method for association  
997 mapping that accounts for multiple levels of relatedness. *Nature Genetics* **38**: 203–208.

998 **Zou YP, Hou XH, Wu Q, Chen JF, Li ZW, Han TS, Niu XM, Yang L, Xu YC, Zhang J,**  
999 **Zhang FM, Tan D, Tian Z, Gu H, Guo YL 2017.** Adaptation of *Arabidopsis thaliana* to the  
1000 Yangtze River basin. *Genome Biology* 2017 18:239-250

1001



Figure 1

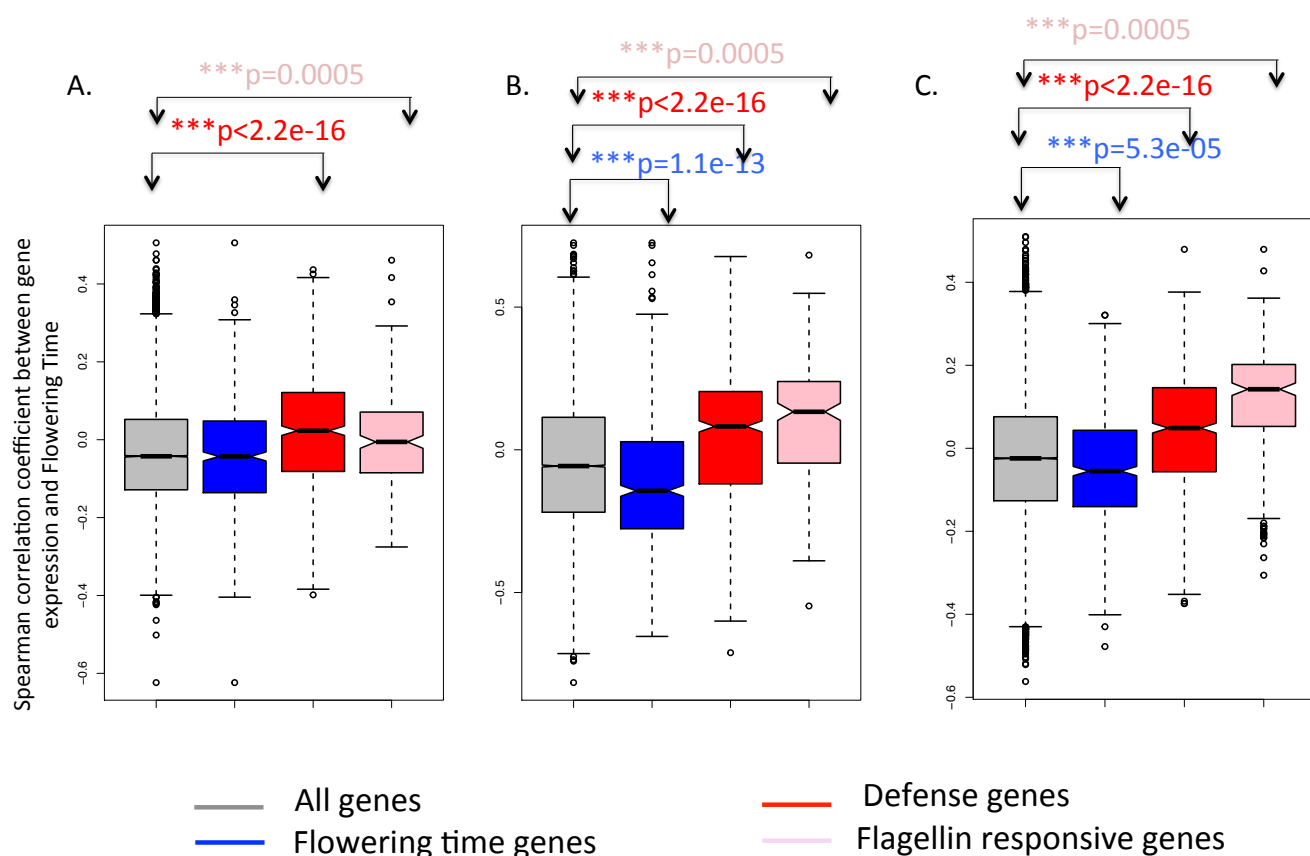

A- FT-dependent regulation

B- Age-dependent regulation

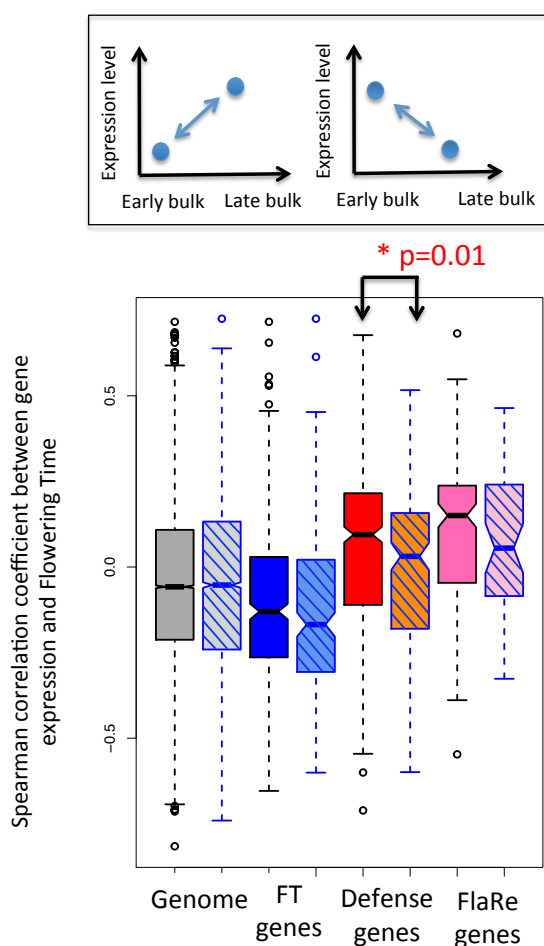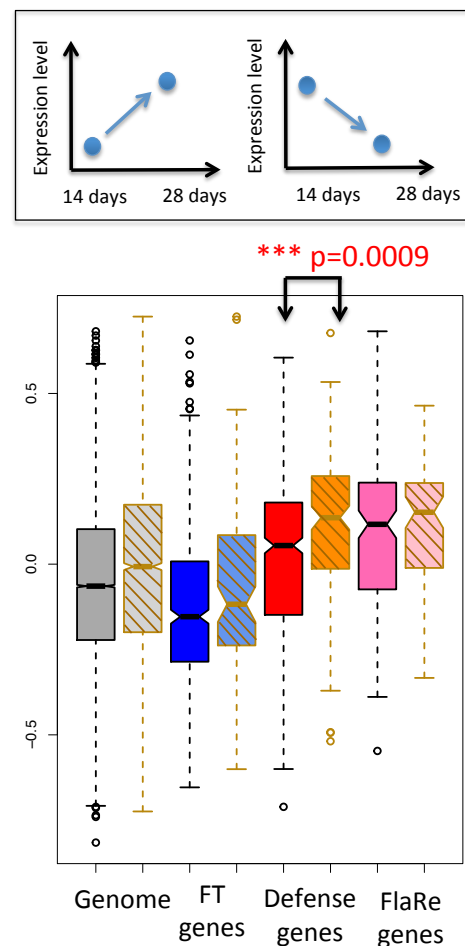

Figure 2

Figure 3

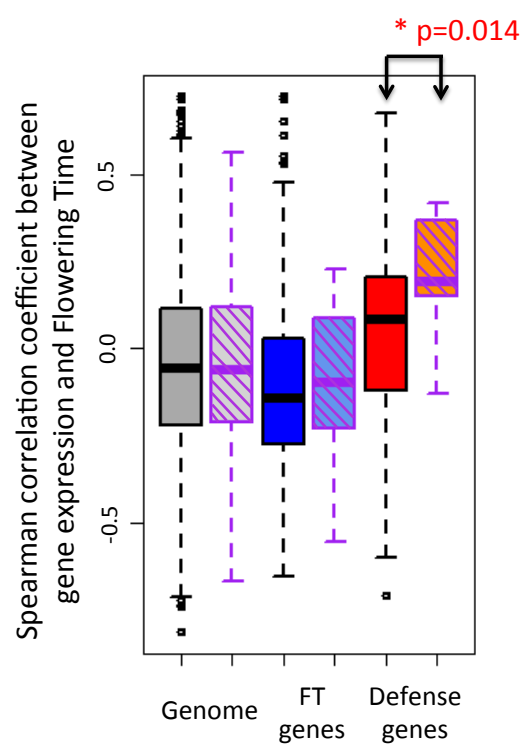

**Suppl. Figure 1:** Distribution of estimated effect of flowering time as explanatory factor of gene expression variation, taking into account population structure between vernalization-independent genotypes from Sweden. The trend shown in Figure 1 is maintained after accounting for population structure. P-values for Kolmogorov-Smirnov test comparing estimate distribution for the gene subset compared to the genome-wide distribution are given. **A.** Density distribution, **B.** Boxplots.

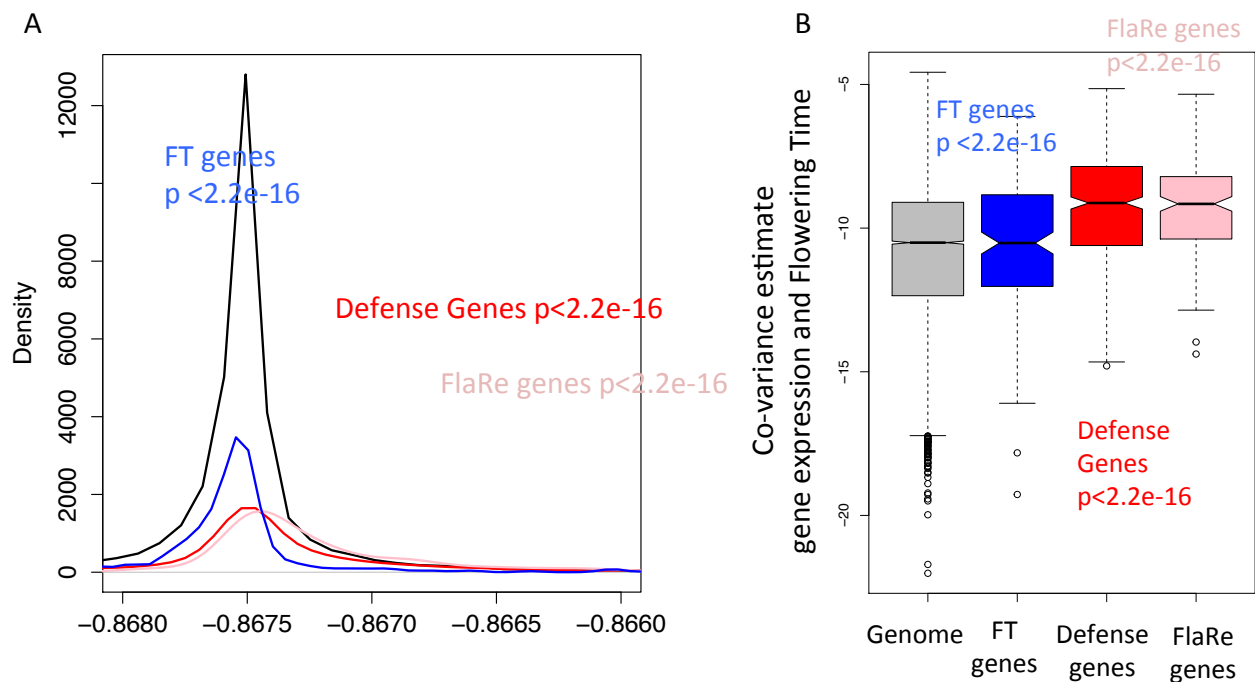

**Suppl. Figure 2:** Distribution of correlation coefficients between gene expression and flowering time restricted to the genes showing differential expression in Col-0 vs. Bur-0. Expression differences between the genotypes Col-0 and Bur-0 recapitulate the pattern reported within natural populations in Figure 1. Distribution of Spearman correlation coefficients between gene expression level and flowering time for a set of genotypes showing consistent differences in flowering at 10°C and 16°C (Group A genotypes, Sasaki et al. 2015). This analysis is restricted to the 6980 genes showing differential expression between Col-0 and Bur-0. Defense genes have a stronger skew in correlation coefficients with flowering time. Spearman correlation coefficients were computed between expression level of each of 6980 expressed *A. thaliana* genes, reported in Durbin et al. 2015 for 9th leaf seedlings, and flowering time measured in the same condition. Genotypes originate from natural populations in Sweden (Sasaki et al. 2015). Black line: All expressed genes, Blue lines: Gene annotated as flowering time genes (FT genes), Red lines: Genes annotated as defense genes, Pink line: Flagellin-responsive (FlaRe) genes (Navarro et al. 2004).

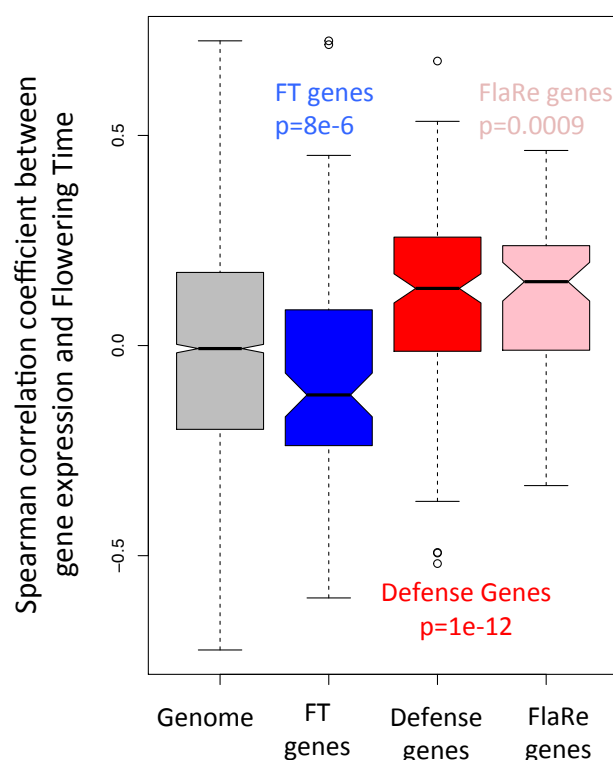

**Suppl. Figure 3:** Bulk-sequencing strategy used to identify FT-dependent genes, i.e. genes whose expression is genetically controlled by flowering time regulators or by genes located closely to and therefore co-segregating with flowering time regulators.

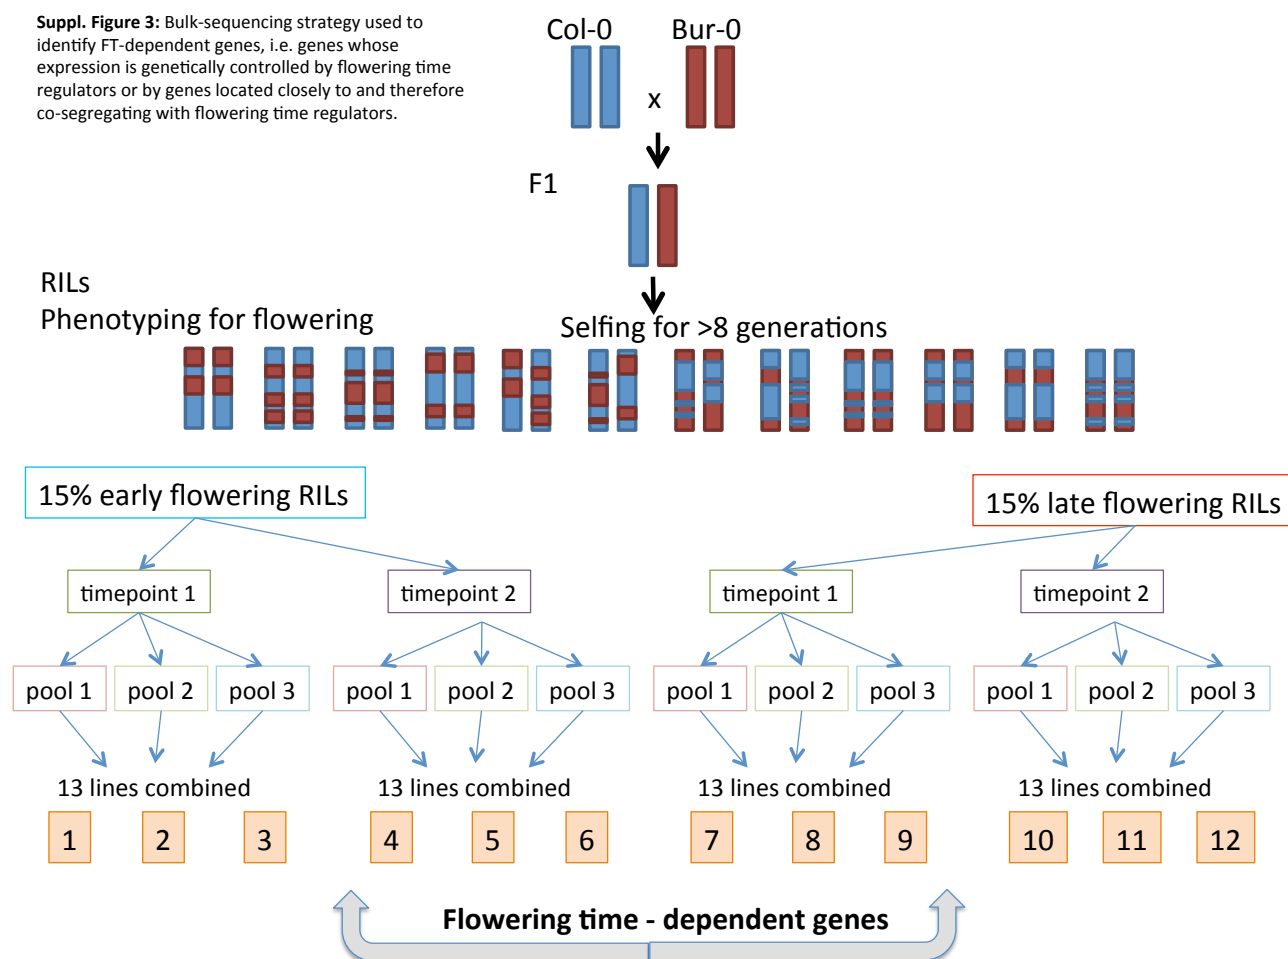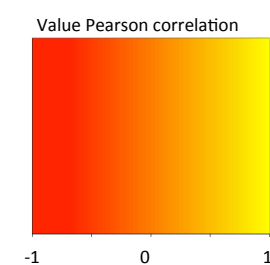

**Suppl. Figure 4:** Heatmap of the correlation in gene expression variation for the 1000 genes showing highest expression variation between samples. Clustering of gene expression levels shows that samples partition by genotype (Col-0, Bur-0), sampling time point (14d, 28d), and flowering time (Early Fl.: Early flowering RIL pool, Late Fl.: Late flowering RIL pool).

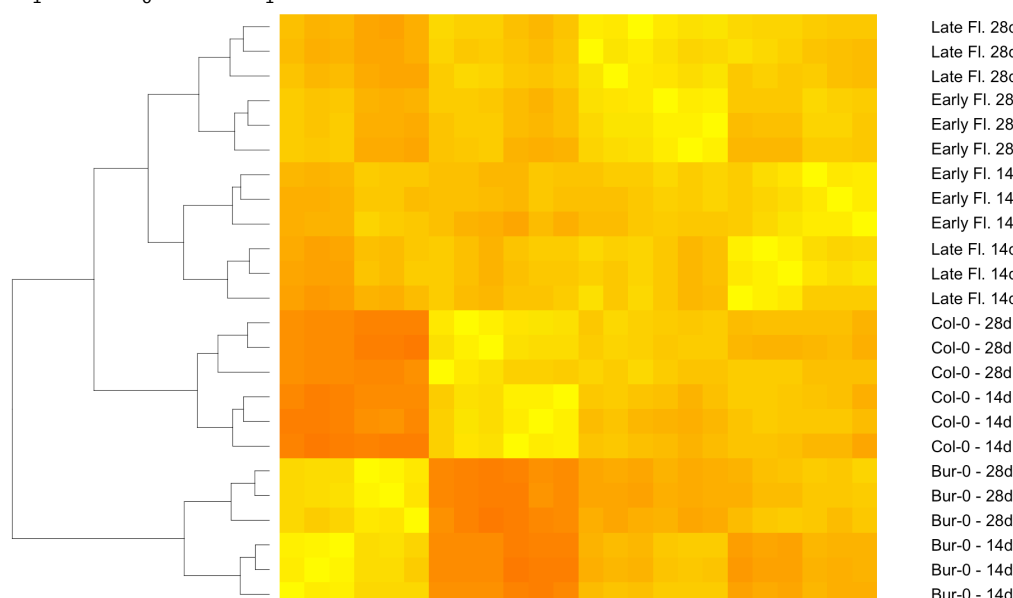

Source: http://biorxiv.org/content/10.1101/131136v4.full.pdf
